# Supplementary material
Source: MDPI journal article supplement (https://www.mdpi.com/2673-6918/3/2/28)
Supplement: s1 [file s1]

Table S1.  $^{13}\text{C}$  NMR data (100 MHz,  $\text{CDCl}_3$ ) of compounds **44-47**, **64,65**, **67** and **68**.

| <b>44</b> | <b>45</b> | <b>46</b> | <b>47</b> |
|-----------|-----------|-----------|-----------|
| 149.84    | 149.41    | 150.05    | 150.55    |
| 143.86    | 143.74    | 144.57    | 144.78    |
| 137.86    | 134.62    | 134.20    | 137.88    |
| 124.79    | 126.73    | 126.71    | 124.73    |
| 113.03    | 113.07    | 113.02    | 113.09    |
| 111.30    | 111.49    | 111.75    | 111.36    |
| 107.71    | 107.11    | 107.02    | 107.60    |
| 83.98     | 84.23     | 84.04     | 83.85     |
| 72.22     | 72.97     | 73.12     | 72.52     |
| 38.63     | 38.36     | 38.26     | 38.70     |
| 36.90     | 36.55     | 37.05     | 37.20     |
| 35.74     | 35.86     | 36.47     | 36.25     |
| 28.41     | 28.11     | 25.91     | 26.23     |
| 25.91     | 25.78     | 25.74     | 25.92     |
| 18.33     | 18.08     | 18.01     | 18.32     |
|           |           |           |           |
| <b>64</b> | <b>65</b> | <b>67</b> | <b>68</b> |
| 151.62    | 151.57    | 151.69    | 151.75    |
| 145.17    | 145.12    | 145.21    | 145.26    |
| 137.08    | 137.04    | 136.50    | 136.43    |
| 124.68    | 124.78    | 124.87    | 125.09    |
| 111.67    | 111.75    | 111.69    | 111.66    |
| 104.30    | 104.36    | 104.93    | 104.82    |
| 80.60     | 80.85     | 80.34     | 79.79     |
| 75.06     | 75.07     | 73.65     | 73.72     |
| 72.66     | 72.70     | 72.70     | 72.74     |
| 40.21     | 40.04     | 39.70     | 39.72     |
| 37.37     | 37.94     | 38.83     | 38.03     |
| 29.07     | 29.67     | 29.98     | 29.47     |
| 28.17     | 28.42     | 28.11     | 28.49     |
| 25.81     | 25.80     | 25.79     | 25.82     |
| 18.35     | 18.33     | 18.23     | 18.24     |
